# Supplementary material for: Photoinduced switching of intramolecular hydrogen bond between amide NH and carboxyl oxygen
Source: Royal Society of Chemistry journal article supplement (doi:10.1039/b516049a), 2006-01-01
Supplement: b516049a.pdf [file b516049a.pdf]

---

## Photoinduced switching of intramolecular hydrogen bond between amide NH and carboxylic oxygen

Takashi Matsuhira,<sup>a</sup> Hitoshi Yamamoto,\*<sup>a</sup> Akira Onoda,<sup>b</sup> Taka-aki Okamura,<sup>a</sup>  
and Norikazu Ueyama<sup>c</sup>

<sup>a</sup> Department of Macromolecular Science, Graduate School of Science, Osaka University, Machikaneyama 1-1,  
Toyonaka, Osaka 563-0043, Japan. Fax: +81-6-6850-5474, Tel: +81-6-6850-5451; E-mail:  
jin@chem.sci.osaka-u.ac.jp

<sup>b</sup> Department of Chemistry, Graduate School of Science, Tokyo University of Science, Shinjuku, Tokyo 162-8601,  
Japan. Fax: +81-3-5228-8251; Tel: +81-3-3260-4272

<sup>c</sup> Center for Advanced Science and Innovation, Osaka University, Yamadaoka 2-1, Suita, Osaka 565-0871, Japan.  
Fax: +81-6-6879-7796; Tel: +81-6-6979-7795

### Electrically Supplemental Information

---

#### Contents

1. Crystallographic data
  2. Schematic illustration of low temperature <sup>1</sup>H NMR spectrum measurement
  3. COSY NMR spectrum of *E*-2'/*Z*-2' under photoirradiation
  4. First-order kinetics of thermal isomerization of *Z*-1 and *Z*-2'
-

## 1. Crystallographic data

**Crystallographic Data Collections and Structure Determinations of tetramethyl-ammonium; (*E*)-3-[[3-(2,2-dimethyl-propionylamino)-benzylidene-amino]-benzoate (*E*-2).** A suitable single colorless crystal of tetramethyl-ammonium; 3-[[3-(2,2-dimethyl-propionylamino)-benzylidene-amino]-benzoate (*E*-2) was mounted on a fine nylon loop with nujol and immediately frozen at 200 K. All measurements were performed on a Rigaku RAXIS-RAPID Imaging Plate diffractometer with graphite monochromated MoK  $\alpha$  radiation. The structures were solved by direct method (SIR 92) and the following refinements were performed using SHELXL-97 and teXsan crystallographic software package. All non-hydrogen atoms were refined anisotropically. H1 was placed by reflection and hydrogen atoms without H1 were placed in the calculated position and including least-square refinement. The basic crystallographic parameters are listed in Table S1.

**Table S1.** Crystal Data and Collection Parameters

| Complex                               | <i>E</i> -2                                                   |
|---------------------------------------|---------------------------------------------------------------|
| Formula                               | C <sub>23</sub> H <sub>31</sub> N <sub>3</sub> O <sub>3</sub> |
| Formula weight                        | 397.52                                                        |
| Crystal Color, Habit                  | colorless, platelet                                           |
| Crystal Dimensions, mm                | 0.30 X 0.30 X 0.20                                            |
| Crystal system                        | monoclinic                                                    |
| Space group                           | P2 <sub>1</sub> /n                                            |
| A, Å                                  | 16.08(2)                                                      |
| B, Å                                  | 8.501(8)                                                      |
| C, Å                                  | 17.00(3)                                                      |
| $\alpha$ , deg                        | —                                                             |
| $\beta$ , deg                         | 104.5(1)                                                      |
| $\gamma$ , deg                        | —                                                             |
| V, Å <sup>3</sup>                     | 2249(1)                                                       |
| Z                                     | 4                                                             |
| D <sub>calc</sub> , g/cm <sup>3</sup> | 1.173                                                         |
| F (000)                               | 1856.00                                                       |

---

|                                  |              |
|----------------------------------|--------------|
| Radiation                        | MoK $\alpha$ |
| Temp, °C                         | -73 $\pm$ 1  |
| 2 $\theta_{\max}$ , deg          | 54.5         |
| Unique data                      | 21943        |
| Unique data ( $I > 3\sigma(I)$ ) | 5009         |
| No. of variables                 | 262          |
| R <sub>1</sub>                   | 0.059        |
| wR <sub>2</sub>                  | 0.103        |
| GOF                              | 0.86         |
| Max Shift / Error                | 0.00         |

---

## 2. Schematic illustration of low temperature $^1\text{H}$ NMR spectrum measurement

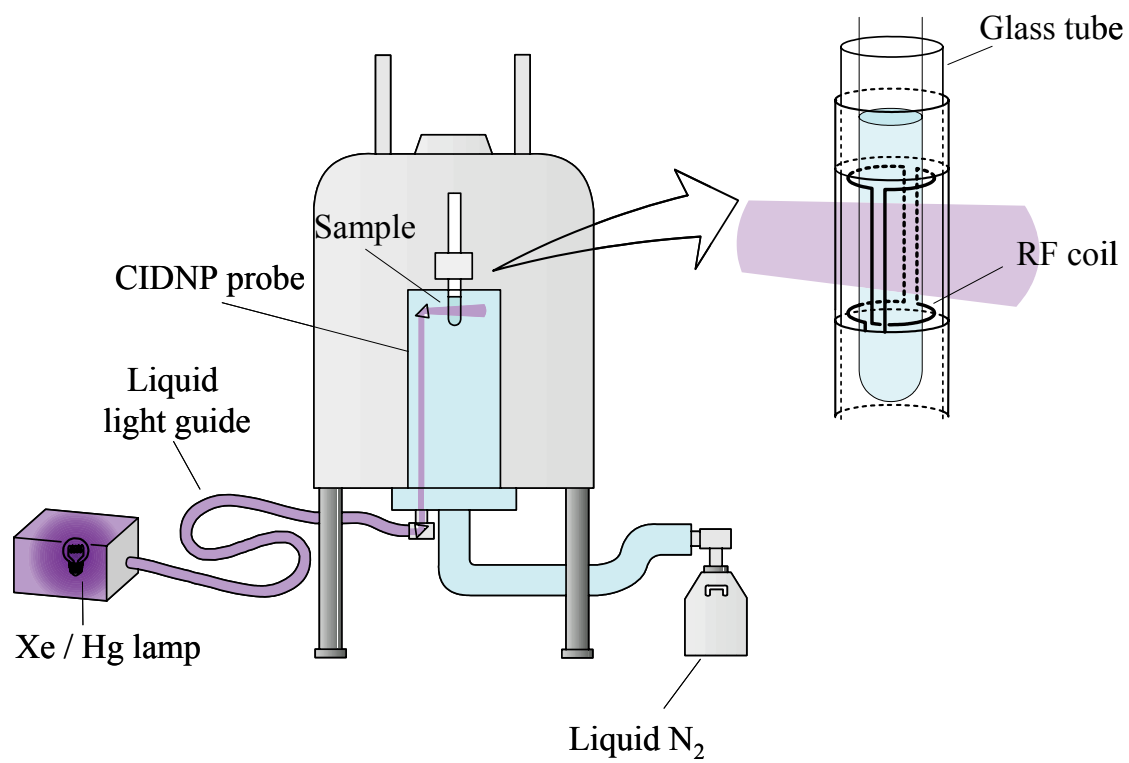

### 3. COSY NMR spectrum of *E*-2'/*Z*-2' under photoirradiation

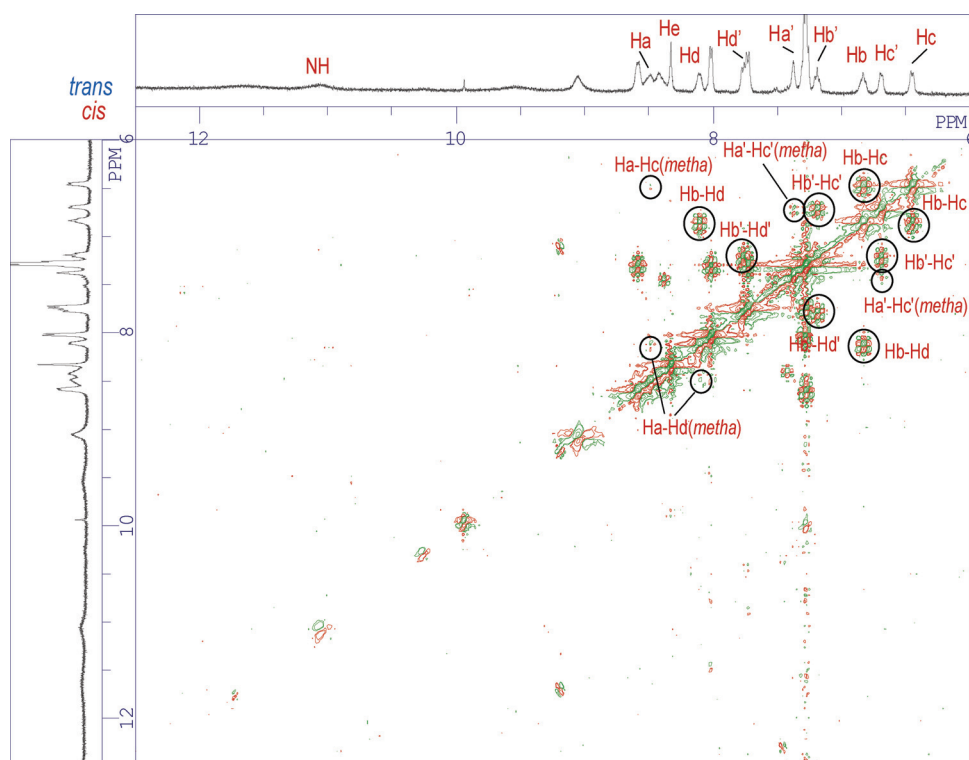

Fig. S1 Photoirradiating COSY NMR spectrum of carboxylate (*E*-2'/*Z*-2') 5 mM in THF-*d*<sub>8</sub> solution at 203 K.

COSY NMR spectrum was measured under photoirradiation to assign the signals of *Z*-2'. *ortho*-Coupling between Hc-Hb-Hd and Hc'-Hb'-Hd' and *meta*-coupling between Ha-Hc-Hd and Ha'-Hc' were observed.

#### 4. First-order kinetics of thermal isomerization of Z-1 and Z-2'

Thermal reversion rate constants of carboxylic acid Z-1 and carboxylate Z-2' in the temperature range from 213 to 243 K were measured by using the time course experiments of UV-vis spectra at 313 nm. Thermal reversion rate  $k$  was obtained from the equation (1). The thermal reversion rate constants were obtained from the slopes of the plots,  $\ln [A_{trans} / (A_{trans} - A(t))]$  versus time( $t$ ).

$$kt = \ln [A_{trans} / (A_{trans} - A(t))] \quad (1)$$

$A_{trans}$  : 313 nm optical density of *trans* isomer,

$A(t)$  : 313 nm optical density at  $t$  seconds after irradiation was finished

The thermal reversion rate constants of Z-1 and Z-2' at several temperatures were shown in Table S2. The thermal reversion of carboxylic acid Z-1 was faster than that of carboxylate Z-2' in the region from 213 to 243 K. This result indicates that the NH...O intramolecular hydrogen bond forming at carboxylate Z-2' is stronger than that of carboxylic acid Z-1.

Activation energies of thermal reversion of Z-1 and Z-2' were obtained from the equation (2), so called *Arrhenius's plot*.

$$k = A \text{EXP}(-E / RT) \quad (2)$$

(  $R$  : gas constant,  $T$  : absolute temperature,  $E$  : activation energy,  $A$  : frequency factor )

**Table S2** Thermal Reversion Rates from Z to E Isomers

| Temp. (K) | Z-1 / E-1            | Z-2' / E-2'          |
|-----------|----------------------|----------------------|
| 243       | $3.1 \times 10^{-2}$ | $1.3 \times 10^{-2}$ |
| 233       | $9.5 \times 10^{-3}$ | $3.4 \times 10^{-3}$ |
| 223       | $1.9 \times 10^{-3}$ | $5.6 \times 10^{-4}$ |
| 213       | $4.0 \times 10^{-4}$ | $1.0 \times 10^{-4}$ |
